# Supplementary material for: Challenges of transferring models of fish abundance between coral reefs
Source: PeerJ journal article supplement (doi:10.7717/peerj.4566), 2018-04-17

### AllFish

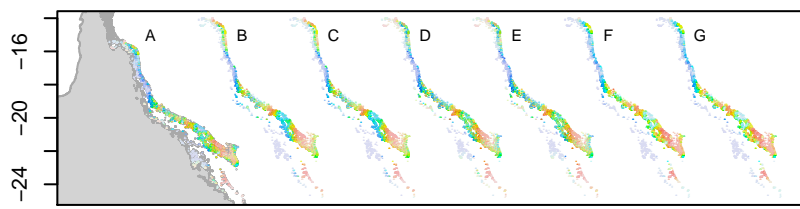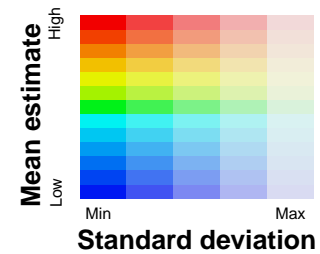

### Acanthuridae

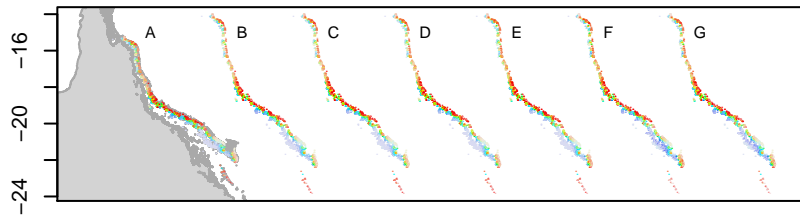

### Chaetodontidae

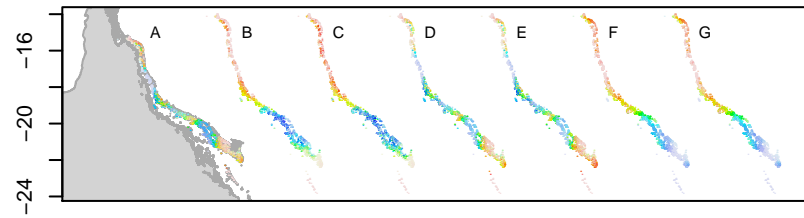

### Labridae

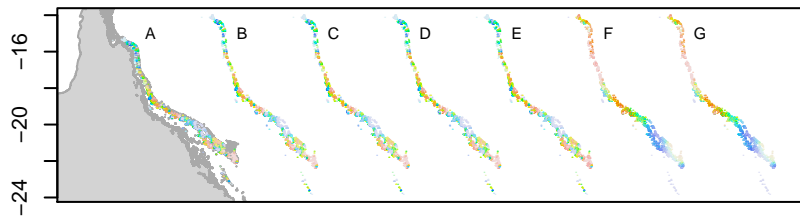

### Lethrinidae

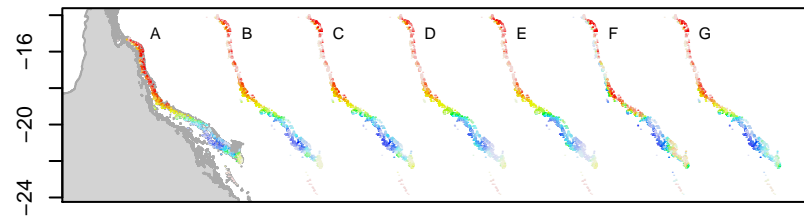

### Lutjanidae

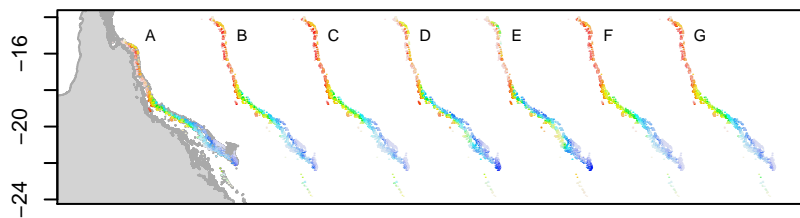

### Pomacentridae

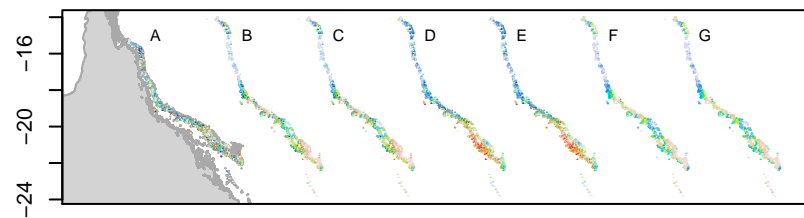

### Scaridae

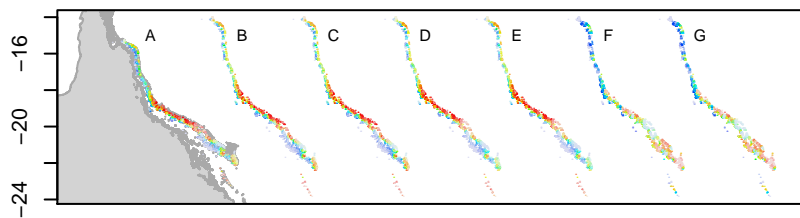

### Serranidae

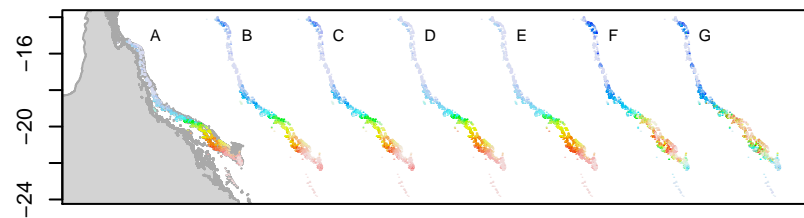

### Siganidae

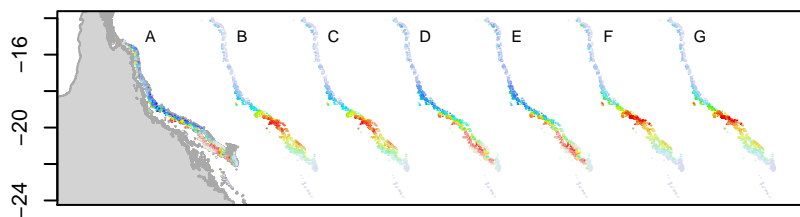

### Zanclidae

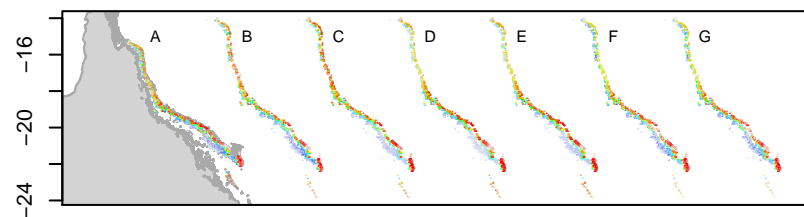

Supplement: S3_Fig.pdf [file S3_Fig.pdf]
